# Supplementary material for: Postovulatory Aging of Mouse Oocytes Impairs Offspring Behavior by Causing Oxidative Stress and Damaging Mitochondria
Source: MDPI journal article supplement (doi:10.3390/cells13090758), 2024-04-28
Supplement: s1 [file s1]

Table S1. Gene-specific primers used for real-time PCR

| cDNA         | Oligonucleotide sequences (5'-3')                           | Amplified product size (bp) |
|--------------|-------------------------------------------------------------|-----------------------------|
| <i>Bdnf</i>  | F: GCCTCCTCTACTCTTTCTG<br>R: GGATTACACTTGGTCTCGA            | 255                         |
| <i>Gr</i>    | F: AGTCAAGGTTTCTGCGT<br>R: CCATCACTTTTGTTCG                 | 233                         |
| <i>Nr2a</i>  | F: ACCTCGCTCTGCTCCAGTTTG<br>R: TCCTGCCATGTTGTCGATGTC        | 131                         |
| <i>Pgc1a</i> | F: CCTGCCATTGTTAAGACCGAGAA<br>R: CTGTGGGTTTGGTGTGAGGAG      | 142                         |
| <i>Sirt1</i> | F: ACGGTATCTATGCTCGCCTTG<br>R: GACACAGAGACGGCTGGAAC         | 150                         |
| <i>Cox1</i>  | F: CCCTCTATCTACTATTTCGGAGCCT<br>R: AACAAAAGCATGGGCAGTTACGAT | 143                         |
| <i>Cox2</i>  | F: CCGAGTCGTTCTGCCAATAGA<br>R: CGGTTTGATGTTACTGTTGCTTGA     | 144                         |
| <i>Pink1</i> | F: GATGACCTTGCAGTTGCTGGAG<br>R: CAGCAGCCAAAGTCTGAGATCACTA   | 141                         |
| <i>Prkin</i> | F: ACCTGCAAACAAGCAACCCT<br>R: CTACCGACGTGTCCTTGTCT          | 172                         |
| <i>Tnfa</i>  | F: TATGGCTCAGGGTCCAATC<br>R: GGAAAGCCCATTGAGTCCT            | 126                         |
| <i>Gapdh</i> | F: AAGGTGGTGAAGCAGGCAT<br>R: GGTCCAGGGTTTCTTACTCCT          | 244                         |

Table S2. Litter size and sex ratio at birth in F1 offspring from freshly-ovulated (FO) or in vivo aged (IVA) oocytes

| Oocyte treatment | Litter size (Recipients)    | Sex ratio (% Males)         |
|------------------|-----------------------------|-----------------------------|
| FO               | 6.39±0.54 <sup>a</sup> (18) | 51.35 <sup>a</sup> (57/111) |
| IVA              | 5.25±0.42 <sup>a</sup> (20) | 51.43 <sup>a</sup> (54/105) |

a: Values with the same letter in superscripts did not differ ( $P>0.05$ ) between FO and IVA offspring.

Table S3-1. Numbers of oocytes used in figure 1

| Graphs | FO                  | IVA-9h              | IVA-18h |
|--------|---------------------|---------------------|---------|
| A      | 101                 | 104                 |         |
| B      | 104                 | 96                  |         |
| C      | 121                 | 120                 |         |
| D      | 94                  | 82                  |         |
| G      | 180                 | 180                 |         |
| H      | 90                  | 90                  | 90      |
| I      | PINK1,64; PARKIN,69 | PINK1,78; PARKIN,68 |         |

Table S3-2. Numbers of mice (litters) observed in figure 2

| Graphs | FO      |         | IVA     |         |
|--------|---------|---------|---------|---------|
|        | Male    | Female  | Male    | Female  |
| A      | 24 (10) | 24 (10) | 25 (10) | 23 (10) |
| B      | 26 (10) | 24 (10) | 26 (10) | 26 (10) |
| C      | 6 (6)   | 6 (6)   | 6 (6)   | 7 (7)   |
| D      | 21 (10) |         | 23 (10) |         |
| E      |         | 21 (10) |         | 19 (10) |
| F      | 21 (9)  |         | 21 (10) |         |
| G      |         | 20 (10) |         | 21 (10) |
| H      | 6 (6)   |         | 6 (6)   |         |
| I      |         | 6 (6)   |         | 6 (6)   |

Table S3-3. Numbers of blastocysts observed in figure 3

| Graphs | FO  | IVA |
|--------|-----|-----|
| A      | 94  | 88  |
| B      | 57  | 60  |
| C      | 180 | 180 |
| D      | 180 | 180 |

Table S3-4. Numbers of mice (litters) observed in figure 4

| Graphs | FO    |        | IVA   |        |
|--------|-------|--------|-------|--------|
|        | Male  | Female | Male  | Female |
| A      | 6 (6) | 6 (6)  | 6 (6) | 6 (6)  |
| B      | 6 (6) |        | 6 (6) |        |
| C      |       | 6 (6)  |       | 6 (6)  |
| D      | 6 (6) | 6 (6)  | 6 (6) | 6 (6)  |
| E      | 6 (6) | 6 (6)  | 6 (6) | 6 (6)  |
| F      | 4 (4) | 4 (4)  | 4 (4) | 4 (4)  |
| G      | 6 (6) | 6 (6)  | 6 (6) | 6 (6)  |

Table S3-5. Numbers of oocytes used in figure 5

| Graphs | HAM                   | MAM | LAM                   |
|--------|-----------------------|-----|-----------------------|
| A      | 102                   | 104 | 101                   |
| B      | 106                   | 100 | 95                    |
| C      | 120                   | 120 | 120                   |
| D      | 92                    | 90  | 89                    |
| G      | 180                   |     | 180                   |
| H      | 180                   |     | 180                   |
| I      | Pink1, 69; Parkin, 68 |     | Pink1, 73; Parkin, 63 |

Table S3-6. Numbers of mice (litters) observed in figure 6

| Graphs | HAM    |         | MAM     |        | LAM    |        |
|--------|--------|---------|---------|--------|--------|--------|
|        | Male   | Female  | Male    | Female | Male   | Female |
| A      | 17 (8) | 16 (8)  | 22 (10) | 20 (9) | 21 (8) | 17 (8) |
| B      | 21 (8) | 21 (8)  | 24 (10) | 20 (9) | 17 (8) | 17 (8) |
| C      | 6 (6)  | 6 (6)   |         |        | 6 (6)  | 6 (6)  |
| D      | 19 (9) |         | 23 (10) |        | 21 (9) |        |
| E      |        | 24 (10) |         | 20 (9) |        | 18 (9) |
| F      | 21 (9) |         | 24 (10) |        | 19 (9) |        |
| G      |        | 22 (10) |         | 20 (9) |        | 17 (9) |
| H      | 6 (6)  |         |         |        | 6 (6)  |        |
| I      |        | 6 (6)   |         |        |        | 6 (6)  |

Table S3-7. Numbers of mice (litters) observed in figure 7

| Graphs | HAM   |        | LAM   |        |
|--------|-------|--------|-------|--------|
|        | Male  | Female | Male  | Female |
| A      | 6 (6) | 6 (6)  | 6 (6) | 6 (6)  |
| B      | 6 (6) |        | 6 (6) |        |
| C      |       | 6 (6)  |       | 6 (6)  |
| D      | 6 (6) | 6 (6)  | 6 (6) | 6 (6)  |
| E      | 6 (6) | 6 (6)  | 6 (6) | 6 (6)  |
| F      | 5 (5) | 5 (5)  | 4 (4) | 4 (4)  |
| G      | 6 (6) | 6 (6)  | 6 (6) | 6 (6)  |

Table S4-1. % Open-arm time (OT)/ (OT + closed arm time (CT)) of EPM in F1 offspring from freshly-ovulated (FO) oocytes and naturally-bred (NB) mice

| Offspring sex | Oocyte treatment | Mice observed (Litters) | % OT / (OT+ CT)        |
|---------------|------------------|-------------------------|------------------------|
| Male          | NB               | 22 (8)                  | 0.45±0.07 <sup>a</sup> |
|               | FO               | 22 (8)                  | 0.43±0.06 <sup>a</sup> |
| Female        | NB               | 22 (8)                  | 0.30±0.04 <sup>a</sup> |
|               | FO               | 24 (9)                  | 0.31±0.04 <sup>a</sup> |

a: Values with the same letter in superscripts did not differ significantly ( $P>0.05$ ) between FO and NB offspring. (The same for the following tables).

Table S4-2. Time (s) in central area of OFT in F1 offspring from freshly-ovulated (FO) oocytes and naturally-bred (NB) mice

| Offspring sex | Oocyte treatment | Mice observed (Litters) | Central time (s)      |
|---------------|------------------|-------------------------|-----------------------|
| Male          | NB               | 22 (8)                  | 44.6±4.2 <sup>a</sup> |
|               | FO               | 24 (8)                  | 43.8±4.1 <sup>a</sup> |
| Female        | NB               | 23 (8)                  | 41.3±3.6 <sup>a</sup> |
|               | FO               | 24 (9)                  | 40.0±3.5 <sup>a</sup> |

Table S4-3. Escape latency (s) on different days in MWM test in F1 offspring from freshly-ovulated (FO) oocytes and naturally-bred (NB) mice

| Offspring sex | Treatment | Mice observed (Litters) | Escape latency (s)    |                       |                       |                       |
|---------------|-----------|-------------------------|-----------------------|-----------------------|-----------------------|-----------------------|
|               |           |                         | Day 1                 | Day 2                 | Day 3                 | Day 4                 |
| Male          | NB        | 22 (8)                  | 86.8±1.2 <sup>a</sup> | 72.8±4.7 <sup>a</sup> | 48.7±4.7 <sup>a</sup> | 45.9±3.3 <sup>a</sup> |
|               | FO        | 23 (8)                  | 90.0±1.2 <sup>a</sup> | 66.3±4.6 <sup>a</sup> | 55.3±4.6 <sup>a</sup> | 43.4±3.3 <sup>a</sup> |
| Female        | NB        | 22 (8)                  | 84.2±1.8 <sup>a</sup> | 53.7±4.1 <sup>a</sup> | 53.0±4.9 <sup>a</sup> | 41.9±4.7 <sup>a</sup> |
|               | FO        | 24 (9)                  | 86.7±1.7 <sup>a</sup> | 49.5±4.0 <sup>a</sup> | 48.5±4.6 <sup>a</sup> | 44.1±4.4 <sup>a</sup> |

Table S4-4. The latency time (s) of acquisition (Acq) and retention (Ret) trials in PAT in F1 offspring from freshly-ovulated (FO) oocytes and naturally-bred (NB) mice

| Offspring sex | Treatment | Mice observed (Litters) | Avoidance latency (s) |                       |
|---------------|-----------|-------------------------|-----------------------|-----------------------|
|               |           |                         | Acq                   | Ret                   |
| Male          | NB        | 22 (8)                  | 26.2±3.6 <sup>a</sup> | 53.3±5.2 <sup>a</sup> |
|               | FO        | 23 (8)                  | 23.6±3.2 <sup>a</sup> | 52.5±5.1 <sup>a</sup> |
| Female        | NB        | 22 (8)                  | 26.6±2.6 <sup>a</sup> | 53.7±4.1 <sup>a</sup> |
|               | FO        | 23 (9)                  | 22.6±2.6 <sup>a</sup> | 49.5±4.0 <sup>a</sup> |

Table S5. Effects of oocyte in vivo aging (IVA) on anxiety-like behavior (ALB) and spatial/fear learning/memory (SF-LM) in F2 offspring. The male or female F2 offspring were from matings between freshly-ovulated (FO) or 9 h-aged (IVA) oocytes-derived F1 and naturally-bred (NB) mice. The tests were started 8 weeks after birth of the F2 offspring. Table S2A and B show % open-arm time (OT)/OT + closed arm time (CT) of EPM and time (s) in central area of OFT, respectively, in male and female F2 offspring. Table S2C and D show escape latency (s) on different test days in MWM test and the avoidance latency time (s) of acquisition and retention trials in passive avoidance test, respectively, in male or female F2 offspring. a: Values with the same letter in superscripts did not differ significantly ( $P>0.05$ ) between FO and IVA F2 offspring.

Table S5A. Effects of IVA on ALB of F2 offspring: EPM test

| Sex of F2 offspring | F1 mating systems | F2 offspring (Litters) | % OT / (OT+ CT)        |
|---------------------|-------------------|------------------------|------------------------|
| Male                | FO♂×NB♀           | 26 (10)                | 0.35±0.05 <sup>a</sup> |
|                     | IVA♂×NB♀          | 21 (9)                 | 0.30±0.06 <sup>a</sup> |
|                     | FO♀×NB♂           | 27 (10)                | 0.29±0.04 <sup>a</sup> |
|                     | IVA♀×NB♂          | 27 (10)                | 0.26±0.04 <sup>a</sup> |
| Female              | FO♂×NB♀           | 24 (8)                 | 0.21±0.04 <sup>a</sup> |
|                     | IVA♂×NB♀          | 22 (9)                 | 0.26±0.04 <sup>a</sup> |
|                     | FO♀×NB♂           | 23 (9)                 | 0.21±0.03 <sup>a</sup> |
|                     | IVA♀×NB♂          | 26 (10)                | 0.20±0.02 <sup>a</sup> |

Table S5B. Effects of IVA on ALB of F2 offspring: OF test

| Sex of F2 offspring | F1 mating systems | F2 offspring (Litters) | Central area time (s)  |
|---------------------|-------------------|------------------------|------------------------|
| Male                | FO♂×NB♀           | 24 (10)                | 45.60±5.0 <sup>a</sup> |
|                     | IVA♂×NB♀          | 20 (9)                 | 43.25±5.4 <sup>a</sup> |
|                     | FO♀×NB♂           | 24 (10)                | 54.86±6.9 <sup>a</sup> |
|                     | IVA♀×NB♂          | 23 (9)                 | 54.80±6.9 <sup>a</sup> |
| Female              | FO♂×NB♀           | 22 (8)                 | 53.42±5.3 <sup>a</sup> |
|                     | IVA♂×NB♀          | 21 (9)                 | 48.44±5.4 <sup>a</sup> |
|                     | FO♀×NB♂           | 19 (10)                | 56.52±6.6 <sup>a</sup> |
|                     | IVA♀×NB♂          | 22 (10)                | 55.33±6.1 <sup>a</sup> |

Table S5C. Effects of IVA on spatial memory of F2 offspring: MWM test

| Sex of F2 offspring | F1 mating systems | F2 offspring (Litters) | Escape latency (s) |           |           |           |
|---------------------|-------------------|------------------------|--------------------|-----------|-----------|-----------|
|                     |                   |                        | Day 1              | Day 2     | Day 3     | Day 4     |
| Male                | FO♂×NB♀           | 24 (9)                 | 89.7±1.1a          | 68.6±4.4a | 50.2±4.4a | 44.0±4.4a |
|                     | IVA♂×NB♀          | 23 (9)                 | 87.0±1.1a          | 71.1±4.3a | 55.7±4.4a | 45.2±4.4a |
|                     | FO♀×NB♂           | 25 (9)                 | 84.9±2.5a          | 69.0±4.8a | 50.2±4.5a | 42.3±3.0a |
|                     | IVA♀×NB♂          | 25 (10)                | 83.9±2.5a          | 65.7±4.7a | 56.5±4.4a | 43.9±2.8a |
| Female              | FO♂×NB♀           | 23 (9)                 | 84.8±2.3a          | 66.3±4.4a | 53.4±4.7a | 43.5±3.7a |
|                     | IVA♂×NB♀          | 24 (9)                 | 82.1±2.2a          | 66.3±4.3a | 52.0±4.7a | 41.9±3.7a |
|                     | FO♀×NB♂           | 24 (9)                 | 86.5±1.9a          | 70.8±4.0a | 48.6±4.0a | 42.1±4.6a |
|                     | IVA♀×NB♂          | 25 (9)                 | 86.4±1.8a          | 71.0±3.9a | 55.3±3.9a | 43.7±4.5a |

Table S5D. Effects of IVA on fear memory of F2 offspring: Passive avoidance test

| Sex of F2 offspring | F1 mating systems | F2 offspring (Litters) | Avoidance latency (s) |                       |
|---------------------|-------------------|------------------------|-----------------------|-----------------------|
|                     |                   |                        | Acquisition           | Retention             |
| Male                | FO♂×NB♀           | 20 (8)                 | 30.4±2.7 <sup>a</sup> | 53.3±4.8 <sup>a</sup> |
|                     | IVA♂×NB♀          | 20 (8)                 | 22.2±2.8 <sup>a</sup> | 52.2±4.8 <sup>a</sup> |
|                     | FO♀×NB♂           | 23 (8)                 | 27.3±2.9 <sup>a</sup> | 55.8±4.7 <sup>a</sup> |
|                     | IVA♀×NB♂          | 21 (8)                 | 29.2±3.0 <sup>a</sup> | 51.0±4.9 <sup>a</sup> |
| Female              | FO♂×NB♀           | 22 (8)                 | 22.2±2.6 <sup>a</sup> | 54.8±4.5 <sup>a</sup> |
|                     | IVA♂×NB♀          | 23 (8)                 | 22.7±2.5 <sup>a</sup> | 52.7±4.4 <sup>a</sup> |
|                     | FO♀×NB♂           | 20 (8)                 | 26.1±3.1 <sup>a</sup> | 53.5±3.8 <sup>a</sup> |
|                     | IVA♀×NB♂          | 21 (9)                 | 22.5±3.0 <sup>a</sup> | 51.7±4.0 <sup>a</sup> |

Table S6. ALB and SF-LM in F2 offspring after oocyte ITA in LAM or HAM. The male or female F2 offspring were from matings between HAM or LAM oocytes-derived F1 and naturally-bred (NB) mice. The tests were started 8 weeks after birth of the F2 offspring. Tables S3A and B show % OT/(OT+CT) of EPM and times (s) in central area of OFT, respectively, in male and female F2 offspring. Tables C and D show escape latency (s) on different test days in MWM test and the latency time (s) of acquisition and retention trials in passive avoidance test, respectively, in male or female F2 offspring. a: Values with the same letter in superscripts did not differ significantly ( $P>0.05$ ) between HAM and LAM F2 offspring.

Table S6A. Effects of LAM-ITA on ALB of F2 offspring: EPM test

| Sex of F2 offspring | F1 mating systems | F2 offspring (Litters) | % OT / (OT+ CT)        |
|---------------------|-------------------|------------------------|------------------------|
| Male                | HAM♂×NB♀          | 25 (9)                 | 0.27±0.06 <sup>a</sup> |
|                     | LAM♂×NB♀          | 22 (9)                 | 0.31±0.06 <sup>a</sup> |
|                     | HAM♀×NB♂          | 24 (10)                | 0.31±0.05 <sup>a</sup> |
|                     | LAM♀×NB♂          | 22 (9)                 | 0.23±0.05 <sup>a</sup> |
| Female              | HAM♂×NB♀          | 20 (7)                 | 0.31±0.06 <sup>a</sup> |
|                     | LAM♂×NB♀          | 20 (7)                 | 0.35±0.05 <sup>a</sup> |
|                     | HAM♀×NB♂          | 18 (7)                 | 0.33±0.06 <sup>a</sup> |
|                     | LAM♀×NB♂          | 17 (6)                 | 0.27±0.06 <sup>a</sup> |

Table S6B. Effects of LAM-ITA on ALB of F2 offspring: OF test

| Sex of F2 offspring | F1 mating systems | F2 offspring (Litters) | Central area time (s) |
|---------------------|-------------------|------------------------|-----------------------|
| Male                | HAM♂×NB♀          | 24 (8)                 | 40.4±4.2 <sup>a</sup> |
|                     | LAM♂×NB♀          | 23 (8)                 | 40.8±4.4 <sup>a</sup> |
|                     | HAM♀×NB♂          | 21 (8)                 | 50.6±5.2 <sup>a</sup> |
|                     | LAM♀×NB♂          | 21 (9)                 | 47.0±5.4 <sup>a</sup> |
| Female              | HAM♂×NB♀          | 21 (8)                 | 49.0±5.5 <sup>a</sup> |
|                     | LAM♂×NB♀          | 20 (7)                 | 46.9±5.6 <sup>a</sup> |
|                     | HAM♀×NB♂          | 19 (7)                 | 50.4±4.9 <sup>a</sup> |
|                     | LAM♀×NB♂          | 21 (7)                 | 50.2±4.6 <sup>a</sup> |

Table S6C. Effects of LAM-ITA on spatial memory of F2 offspring: MWM test

| Sex of F2 offspring | F1 mating systems | F2 offspring (Litters) | Escape latency (s) |           |            |            |
|---------------------|-------------------|------------------------|--------------------|-----------|------------|------------|
|                     |                   |                        | Day 1              | Day 2     | Day 3      | Day 4      |
| Male                | HAM♂×NB♀          | 25 (9)                 | 89.8±1.8a          | 70.6±4.4a | 51.9±5.8a  | 46.4±4.0a  |
|                     | LAM♂×NB♀          | 23 (8)                 | 84.6±1.9a          | 69.9±4.6a | 55.4±6.0a  | 44.0±4.3a  |
|                     | HAM♀×NB♂          | 23(9)                  | 87.5±1.6a          | 63.9±4.3a | 53.4±3.8a  | 43.1±3.9a  |
|                     | LAM♀×NB♂          | 24 (9)                 | 85.8±1.6a          | 71.5±4.2a | 49.6±3.7a  | 41.7±3. 8a |
| Female              | HAM♂×NB♀          | 24 (9)                 | 88.7±1.7a          | 70.3±3.9a | 48.1±3.9a  | 43.1±4.8a  |
|                     | LAM♂×NB♀          | 24 (9)                 | 83.9±1.8a          | 73.5±4.0a | 54.8±a4.0  | 41.5±4.7a  |
|                     | HAM♀×NB♂          | 25 (9)                 | 88.0±1.3a          | 63.2±4.3a | 51.2±4.7a  | 42.6±4.5a  |
|                     | LAM♀×NB♂          | 24 (10)                | 87.2±1.3a          | 70.4±4.4a | 53.2±4.7 a | 41.9±4.6a  |

Table S6D. Effects of LAM-ITA on fear memory of F2 offspring: Passive avoidance test

| Sex of F2 offspring | F1 mating systems | F2 offspring (Litters) | Avoidance latency (s) |                        |
|---------------------|-------------------|------------------------|-----------------------|------------------------|
|                     |                   |                        | Acquisition           | Retention              |
| Male                | HAM♂×NB♀          | 24 (8)                 | 26.0±3.8 <sup>a</sup> | 56.6±3.4 <sup>a</sup>  |
|                     | LAM♂×NB♀          | 22 (8)                 | 23.1±3.7 <sup>a</sup> | 50.8±3.5 <sup>a</sup>  |
|                     | HAM♀×NB♂          | 23 (8)                 | 25.6±4.0 <sup>a</sup> | 56.3±5.6 <sup>a</sup>  |
|                     | LAM♀×NB♂          | 23 (8)                 | 23.6±4.0 <sup>a</sup> | 59.1±5.6 <sup>a</sup>  |
| Female              | HAM♂×NB♀          | 20 (8)                 | 25.0±2.6 <sup>a</sup> | 51.7±4.8 <sup>a</sup>  |
|                     | LAM♂×NB♀          | 22 (8)                 | 25.4±2.6 <sup>a</sup> | 55.4±4.7 <sup>a</sup>  |
|                     | HAM♀×NB♂          | 24 (8)                 | 29.2±5.8 <sup>a</sup> | 50.8±4.3 <sup>a</sup>  |
|                     | LAM♀×NB♂          | 23 (8)                 | 36.8±5.5 <sup>a</sup> | 50.4±4. 3 <sup>a</sup> |
